# Supplementary material for: Bipiperidinyl Derivatives of Cannabidiol Enhance Its Antiproliferative Effects in Melanoma Cells
Source: MDPI journal article supplement (doi:10.3390/antiox13040478), 2024-04-17
Supplement: s1 [file s1]

## SUPPLEMENTARY MATERIALS

# Bipiperidinyl Derivatives of Cannabidiol Enhance Its Antiproliferative Effects in Melanoma Cells

Peihong Lyu <sup>1,2</sup>, Huifang Li <sup>1</sup>, Junzhao Wan <sup>3</sup>, Ying Chen <sup>1,4</sup>, Zhen Zhang <sup>5</sup>, Panpan Wu <sup>5</sup>, Yinsheng Wan <sup>6</sup>, Navindra P. Seeram <sup>1</sup>, Jean Christopher Chamcheu <sup>7,8</sup>, Chang Liu <sup>1</sup>, and Hang Ma <sup>1\*</sup>

<sup>1</sup> Bioactive Botanical Research Laboratory, Department of Biomedical and Pharmaceutical Sciences, College of Pharmacy, University of Rhode Island, Kingston, RI 02881, USA

<sup>2</sup> Department of Dermatology, Affiliated Hospital of Guizhou Medical University, Guiyang, Guizhou 550001, China

<sup>3</sup> School of Pharmacy, Guizhou Medical University, Guiyang, Guizhou 550001, China.

<sup>4</sup> Department of Obstetrics and Gynecology, The Second Affiliated Hospital of Soochow University, Suzhou 215004, China

<sup>5</sup> School of Pharmacy and Food Engineering, Guangdong Provincial Key Laboratory of Large Animal Models for Biomedicine, Wuyi University, Jiangmen 529020, China

<sup>6</sup> Department of Biology, Providence College, Providence, RI 02918, USA

<sup>7</sup> Department of Biological Sciences and Chemistry, College of Sciences and Engineering, Southern University and A&M College, Baton Rouge, LA 70807, USA

<sup>8</sup> Department of Pathobiological Sciences, School of Veterinary Medicine, Louisiana State University, Baton Rouge, LA 70803, USA

**Table S1.** Inhibitory effects of the reaction intermediate **37-49** with a leaving group triflate (-OTf) or a protecting group pivaloyl (-Piv) on the growth of B16F10 cells at the concentration of 20  $\mu$ M.

| Compound                                                                            | MW<br>(g/mol) | Functional group                                                                                     | Inhibition        |
|-------------------------------------------------------------------------------------|---------------|------------------------------------------------------------------------------------------------------|-------------------|
| <b>37</b>                                                                           | 260.33        | 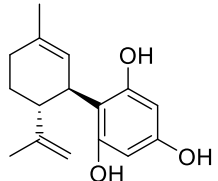                    | n.a. <sup>a</sup> |
| <b>38</b>                                                                           | 392.39        |                     | n.a.              |
| <b>39</b>                                                                           | 560.63        |                   | n.a.              |
|  |               |                                                                                                      |                   |
| Compound                                                                            | MW(g/mol)     | Functional group                                                                                     | Inhibition        |
| <b>40</b>                                                                           | 426.60        | R <sub>2</sub> =  | n.a.              |
| <b>41</b>                                                                           | 440.62        | R <sub>2</sub> =  | n.a.              |
| <b>42</b>                                                                           | 452.64        | R <sub>2</sub> =  | n.a.              |
| <b>43</b>                                                                           | 454.65        | R <sub>2</sub> =  | n.a.              |

|    |        |                  |                                                                                   |      |
|----|--------|------------------|-----------------------------------------------------------------------------------|------|
| 44 | 494.72 | R <sub>2</sub> = |  | n.a. |
| 45 | 480.69 | R <sub>2</sub> = |  | n.a. |
| 46 | 488.67 | R <sub>2</sub> = |  | n.a. |

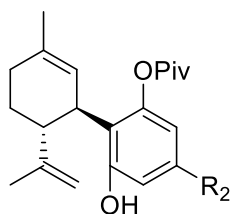

| Compound | MW(g/mol) |                  | Functional group                                                                    | Inhibition |
|----------|-----------|------------------|-------------------------------------------------------------------------------------|------------|
| 47       | 370.53    | R <sub>2</sub> = |    | n.a.       |
| 48       | 410.60    | R <sub>2</sub> = |   | 32.3%      |
| 49       | 396.57    | R <sub>2</sub> = |  | 49.0%      |

<sup>a</sup>n.a. = not active (no inhibition)

**Table S2.** Inhibitory effects of the synthetic cannabinoids **50-56** with various side chains on the growth of B16F10 cells at the concentration of 20  $\mu$ M.

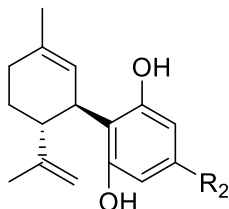

| Compound  | MW(g/mol) |                  | Functional group | Inhibition        |
|-----------|-----------|------------------|------------------|-------------------|
| <b>50</b> | 258.36    | R <sub>2</sub> = |                  | n.a. <sup>a</sup> |
| <b>51</b> | 272.39    | R <sub>2</sub> = |                  | n.a.              |
| <b>52</b> | 284.40    | R <sub>2</sub> = |                  | n.a.              |
| <b>53</b> | 286.42    | R <sub>2</sub> = |                  | n.a.              |
| <b>54</b> | 326.48    | R <sub>2</sub> = |                  | 61.7%             |
| <b>55</b> | 312.45    | R <sub>2</sub> = |                  | 55.2%             |
| <b>56</b> | 320.43    | R <sub>2</sub> = |                  | n.a.              |

<sup>a</sup>n.a. = not active (no inhibition)
